# Supplementary material
Source: publisher figshare collection journal article supplement (https://acs.figshare.com/ndownloader/files/20979162)
Supplement: Supplementary file 1 [file 20979162]

# Supporting Information

## Modulation Effect of Permanganate and Manganese (II) ion on the Oscillatory Dynamics in a Bromate-Sulfite Reaction System

Ling Yuan\*, Zhuoxuan Li, Mengfei Liu, Xiaoli Lv, Qingyu Gao\*

College of Chemical Engineering, China University of Mining and Technology,

Xuzhou 221116 P R China

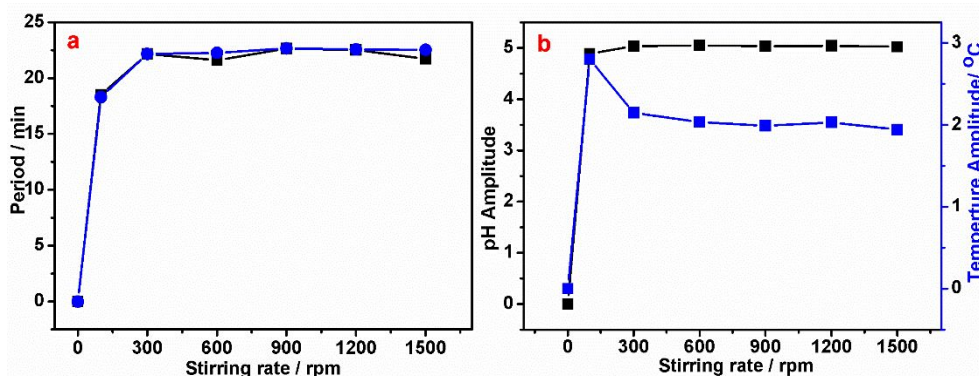

Figure S1 Measured oscillatory amplitude and period as a function of stirring rate in a CSTR. Initial conditions were the same as Figure 5.

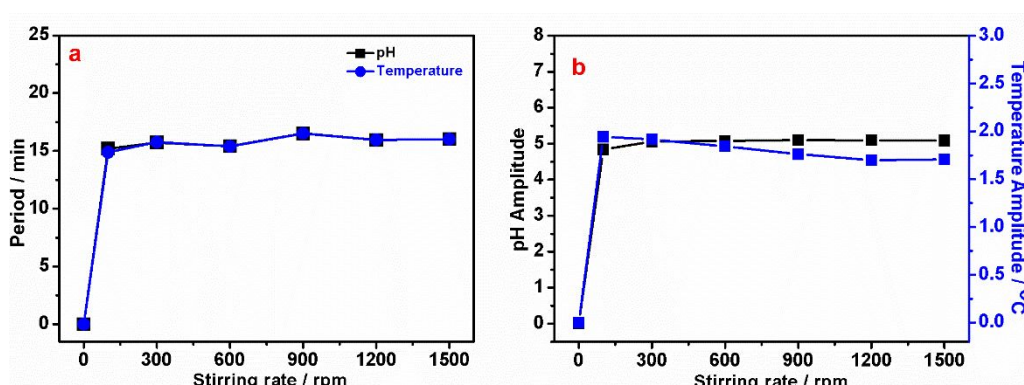

Figure S2 Measured oscillatory amplitude and period as a function of stirring rate in BSP reaction system. Initial conditions were the same as Figure 3.

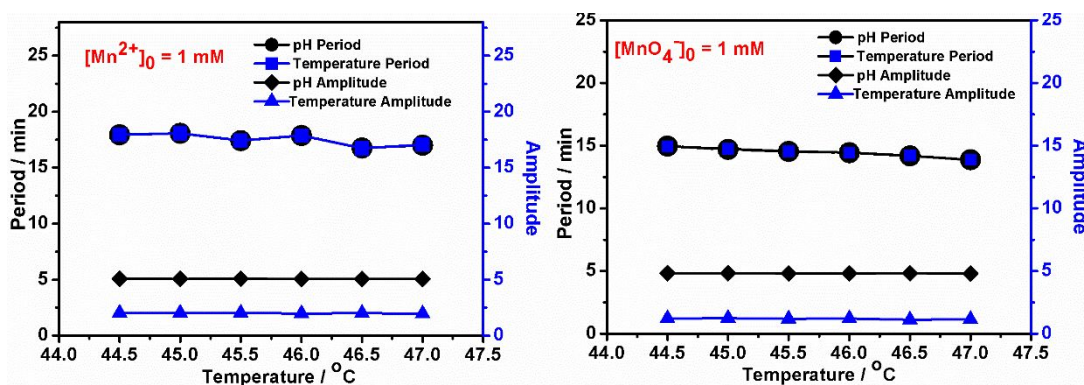

Figure S3 Measured oscillatory amplitude and period as a function of temperature in BSM and BSP reaction systems. Initial conditions were the same as Figure 3 and Figure 5.
